# Supplementary material
Source: ML conference proceedings conference paper supplement (https://proceedings.neurips.cc/paper_files/paper/2021/hash/4d410063822cd9be28f86701c0bc3a31-Abstract.html)
Supplement: Supplementary file [file 4d410063822cd9be28f86701c0bc3a31-Supplemental.pdf]

---

## Supplement

---

### A. Proofs

In this section we provide detailed proofs of our theoretical results.

#### A.1. Proof of Proposition 1

Note that  $\pi(B) = \sum_{i=1}^p \pi(B_i)$  is a separable sum. From Boyd and Vandenberghe (2004) we have

$$\pi^*(Z) = \sum_{i=1}^p \pi^*(Z_i). \quad (\text{A1})$$

To compute  $\pi^*(Z_i)$ , we use a result from Touchette (2005). Define  $g(b) = (Z_i)^T b - \pi(b) = (Z_i)^T b - \lambda_1 \|b\|_2 - (\lambda_2/2) \|b\|_2^2$ , and let  $b^* = \arg \max_{b \in \mathbb{R}^p} g(b)$ . Then

$$\pi^*(Z_i) = g(b^*). \quad (\text{A2})$$

To find  $b^*$  we have to solve  $\nabla g(b) = 0$ , where  $\nabla g(b) = Z_i - \lambda_2 - \lambda_1 \begin{cases} \|b\|_2^{-1} b & \|b\|_2 \neq 0 \\ \{b : \|b\|_2 \leq 1\} & o.w. \end{cases}$ . Consider the case where  $\|b\|_2 \neq 0$  and set  $\nabla g(b) = 0$ . We get

$$Z_i = (\lambda_2 + \|b\|_2^{-1} \lambda_1) b. \quad (\text{A3})$$

To solve for  $b$  we must first compute  $\|b\|_2$ . Taking the norm of both sides, we get  $\|Z_i\|_2 = (\lambda_2 + \|b\|_2^{-1} \lambda_1) \|b\|_2$ . Thus,  $\|b\|_2 = \lambda_2^{-1} (\|Z_i\|_2 - \lambda_1)$ . Plugging the last expression in (A3) and solving for  $b$ , we obtain  $b^* = \lambda_2^{-1} (1 - \|Z_i\|_2^{-1} \lambda_1) Z_i$ , for  $\|b^*\|_2 \neq 0$ . We need to take into account that  $\text{dom}(p) = \text{range}(p^*)$  and vice-versa. In particular,  $\|b^*\|_2 \neq 0$  iff  $\|Z_i\|_2 > \lambda_1$ . Therefore, we have

$$b^* = \begin{cases} \lambda_2^{-1} (1 - \|Z_i\|_2^{-1} \lambda_1) Z_i & \|Z_i\|_2 > \lambda_1 \\ 0 & o.w. \end{cases}. \quad (\text{A4})$$

From (A2) we now need to compute  $g(b^*)$ . If  $\|Z_i\|_2 \leq \lambda_1$ , then  $g(b^*) = 0$ . If  $\|Z_i\|_2 > \lambda_1$ , after some algebraic manipulations, we obtain  $g(b^*) = (2\lambda_2)^{-1} (\|Z_i\|_2 - \lambda_1)^2$ . Finally, (A1) gives us the desired result

$$\pi^*(Z) = (2\lambda_2)^{-1} \sum_{i=1}^p \begin{cases} (\|Z_i\|_2 - \lambda_1)^2 & \|Z_i\|_2 > \lambda_1 \\ 0 & o.w. \end{cases}. \quad (\text{A5})$$

#### A.2. Proof of Proposition 2

Since  $\pi(B) = \sum_{i=1}^p \pi(B_i)$  is a separable sum, from Beck (2017) Remark 6.7, we know

$$\text{prox}_{\sigma\pi}(B) = (\text{prox}_{\sigma\pi}(B_1), \dots, \text{prox}_{\sigma\pi}(B_p))^T. \quad (\text{A6})$$

From Fan and Reimherr (2016), we have  $\text{prox}_{\sigma\lambda_1\|\cdot\|_2}(B_i) = [1 - \|B_i\|_2^{-1} \sigma\lambda_1]_+ B_i$ . From Beck (2017) 6.2.3, we have  $\text{prox}_{(\sigma\lambda_2/2)\|\cdot\|_2^2}(B_i) = (1 + \sigma\lambda_2)^{-1} B_i$ . Moreover,  $\|\cdot\|_2^2$  is a proper closed and convex function, thus we can compose  $\text{prox}_{(\sigma\lambda_2/2)\|\cdot\|_2^2}$  and  $\text{prox}_{\sigma\lambda_1\|\cdot\|_2}$  as described in Parikh et al. (2014), obtaining the desired form

$$\text{prox}_{\sigma\pi}(B_i) = (1 + \sigma\lambda_2)^{-1} [1 - \|B_i\|_2^{-1} \sigma\lambda_1]_+ B_i. \quad (\text{A7})$$

### A.3. Proof of Proposition 3

We first prove (b), i.e.  $\bar{Z} = \text{prox}_{\pi^*/\sigma}(B/\sigma - X^T \bar{V})$ . If we compute the derivative of  $\mathcal{L}_\sigma(Z | \bar{V}, B)$  with respect to  $Z_i$  and we set it equal to 0, we obtain

$$B_i/\sigma - (X^T \bar{V} - \bar{Z}_i) = \nabla \pi^*(\bar{Z}_i)/\sigma \quad (\text{A8})$$

We now use the sub-gradient proximal operators characterization (Correa et al., 1992):

$$u = \text{prox}_f(t) \text{ if and only if } t - u \in \partial f(u). \quad (\text{A9})$$

Considering  $t = B_i/\sigma - \bar{V}^T X_{(i)}$ ,  $u = \bar{Z}_i$ , and  $f = \pi^*/\sigma$ , the right hand side of (A9) is true by (A8). The left hand side of (A9) gives us  $\bar{Z}_i = \text{prox}_{\pi^*/\sigma}(B_i/\sigma - \bar{V}^T X_{(i)})$ . To conclude the first part of the proof just note that  $\bar{Z} = (\bar{Z}_1, \dots, \bar{Z}_p)^T$ .

For the second part of the proof, we need to find  $\psi(V) := \mathcal{L}_\sigma(V | \bar{Z}, B)$ . First, note that by the Moreau decomposition (4)  $\bar{Z} = B/\sigma - X^T V - (1/\sigma) \text{prox}_{\sigma\pi}(B - \sigma X^T V)$ . Plugging this into (5), after some algebraic manipulations, we obtain

$$\psi(V) = h^*(V) + \pi^*(\bar{Z}) + \frac{1}{2\sigma} \sum_{i=1}^p \left\| \text{prox}_{\sigma\pi}(B_i - \sigma V^T X_{(i)}) \right\|_2^2 - \frac{1}{2\sigma} \sum_{i=1}^p \|B_i\|_2^2. \quad (\text{A10})$$

We now have to compute  $\pi^*(\bar{Z})$ . If we set  $T = B - \sigma X^T V$ , then  $\pi^*(\bar{Z}) = \sum_{i=1}^p \pi^*(\text{prox}_{\pi^*/\sigma}(T_i/\sigma))$ . In particular

$$\text{prox}_{\pi^*/\sigma}(T_i/\sigma) = T_i/\sigma - (1/\sigma) \text{prox}_{\sigma\pi}(T_i) = \begin{cases} (1 + \sigma\lambda_2)^{-1}(\lambda_2 + \|T_i\|_2^{-1} \lambda_1) T_i & \|T_i\|_2 > \sigma\lambda_1 \\ T_i/\sigma & \text{o.w.} \end{cases}. \quad (\text{A11})$$

Composing (A11) and (2), again after some algebraic manipulations, we get

$\pi^*(\bar{Z}) = (\lambda_2/2) \sum_{i=1}^p \left\| \text{prox}_{\sigma\pi}(B_i - \sigma V^T X_{(i)}) \right\|_2^2$ . Plugging this into (A10) concludes our proof.

### A.4. Proof of Theorem 1

Remember that  $T = B - \sigma X^T V$  and  $\hat{X} = X \otimes I_k$ . To prove (i), we just take the gradient of  $\psi(Y)$  with respect to  $Y$ , as given in (11). In particular, note that  $\frac{\partial V^T X_{(i)}}{\partial V_j} = X_{ji}$ , i.e. the element in the  $j$ -th row and  $i$ -th column of the matrix  $X$ , and therefore that

$$\nabla_V \left( \frac{1 + \sigma\lambda_2}{2\sigma} \sum_{i=1}^p \left\| \text{prox}_{\sigma\pi}(B_i - \sigma V^T X_{(i)}) \right\|_2^2 \right) = \begin{bmatrix} -\sum_{i=1}^p X_{1i} \text{prox}_{\sigma\pi}(B_i - \sigma V^T X_{(i)}) \\ \vdots \\ -\sum_{i=1}^p X_{mi} \text{prox}_{\sigma\pi}(B_i - \sigma V^T X_{(i)}) \end{bmatrix} = -X \text{prox}_{\sigma\pi}(T). \quad (\text{A12})$$

Next, to prove (ii), note that  $\hat{\partial}^2 \psi(V)$  is the  $nk \times nk$  symmetric matrix  $\begin{bmatrix} \frac{\partial \psi}{\partial V_1 \partial V_1} & \cdots & \frac{\partial \psi}{\partial V_1 \partial V_n} \\ \vdots & \ddots & \vdots \\ \frac{\partial \psi}{\partial V_n \partial V_1} & \cdots & \frac{\partial \psi}{\partial V_n \partial V_n} \end{bmatrix}$ . In particular, each block

here is the  $k \times k$  matrix

$$\frac{\partial \psi}{\partial V_t \partial V_s} = \begin{cases} I_k + \sigma \sum_{i=1}^p X_{ti} \partial \text{prox}_{\sigma\pi}(T_i) X_{si} & t = s \\ \sigma \sum_{i=1}^p X_{ti} \partial \text{prox}_{\sigma\pi}(T_i) X_{si} & t \neq s \end{cases}. \quad (\text{A13})$$

Thus, we have

$$\hat{\partial}^2 \psi(V) = I_{nk} + \sum_{i=1}^p \begin{bmatrix} X_{1i} \partial \text{prox}_{\sigma\pi}(T_i) X_{1i} & \cdots & X_{1i} \partial \text{prox}_{\sigma\pi}(T_i) X_{ni} \\ \vdots & \ddots & \vdots \\ X_{ni} \partial \text{prox}_{\sigma\pi}(T_i) X_{1i} & \cdots & X_{ni} \partial \text{prox}_{\sigma\pi}(T_i) X_{ni} \end{bmatrix} = I_{nk} + \hat{X} \partial \text{prox}_{\sigma\pi}(T) \hat{X}^T. \quad (\text{A14})$$

We now need to show that  $Q \in \partial \text{prox}_{\sigma\pi}(T)$ . Note that  $\partial \text{prox}_{\sigma\pi}(T)$  is a  $pk \times pk$  block-diagonal matrix, since  $\frac{\partial \text{prox}_{\sigma\pi}(T_i)}{\partial T_j} = 0$  for  $i \neq j$ . Let us focus on  $T_1$ , and let  $t_1, \dots, t_k$  be its  $k$  elements. Then,  $(\partial \text{prox}_{\sigma\pi}(T_1))_{ij} = \frac{\partial \text{prox}_{\sigma\pi}(t_i)}{\partial t_j}$ , for

$i, j = 1, \dots, k$ . Specifically, for  $\|T_i\|_2 \leq \sigma\lambda_1$ , it is straightforward to see that  $\partial \text{prox}_{\sigma\pi}(T_1) = 0$ . For  $\|T_i\|_2 > \sigma\lambda_1$ , knowing that  $\frac{\partial \|T_i\|_2}{\partial t_i} = \|T_i\|_2^{-1} t_i$ , after some algebraic manipulations we obtain

$$\frac{\partial \text{prox}_{\sigma\pi}(t_i)}{\partial t_j} = (1 + \sigma\lambda_2)^{-1} \begin{cases} 1 - \sigma\lambda_1 \|T_i\|_2^{-1} + \|T_i\|_2^{-3} \sigma\lambda_1 t_i^2 & i = j \\ \|T_i\|_2^{-3} \sigma\lambda_1 t_i t_j & i \neq j \end{cases}. \quad (\text{A15})$$

(A15) shows us that  $P_1 = \partial \text{prox}_{\sigma\pi}(T_1)$ . Without loss of generality, we can do the same way for  $T_2, \dots, T_p$  and prove (iii). To conclude the proof of the theorem, we note that since  $Q \in \partial \text{prox}_{\sigma\pi}(T)$ , then  $I_{nk} + \sigma \hat{X} Q \hat{X}^T \in \hat{\partial}^2 \psi(V)$ , and from Hiriart-Urruty et al. (1984) we have  $\partial^2 \psi(V) \text{vec}(D) = (I_{nk} + \sigma \hat{X} Q \hat{X}^T) \text{vec}(D)$ , for every  $D$  in the domain of  $V$

## B. Additional Simulation Results

We ran all simulations on a MacBookPro with 3.3 GHz DualCore Intel Core i7 processor and 16GB ram. We reran all python simulations using openblas and mkl as blas systems, with threads=1,2 and openmp, with threads=1,4. In all scenarios, times match those reported in the paper that are obtained considering openblas with 2 threads and openmp with 4 threads. The following versions of sklearn and glmnet are used: scikit-learn==0.22.2 and glmnet==4.1

Table B.1.  $a$ ,  $b$  and  $c$  report mean CPU time in seconds for fgen, sklearn and glmnet, respectively, over 20 replications of the same simulation scenari. In parenthesis we report standard errors. For each scenario we consider three values of  $c_\lambda$ , which are held fixed over the replications.

| $\alpha = 0.8, l = 0.25$ |   |             | n=1000            |            |            | n=5000            |             |            |
|--------------------------|---|-------------|-------------------|------------|------------|-------------------|-------------|------------|
| $p; p_0$                 | k | $c_\lambda$ | a                 | b          | c          | a                 | b           | c          |
| $2(10^4); 10$            | 5 | 0.8         | <b>0.2</b> (0.02) | 1 (0.03)   | 0.7 (0.01) | <b>0.6</b> (0.01) | 9.1 (0.24)  | 3.1 (0.03) |
|                          |   | 0.4         | <b>0.3</b> (0.00) | 1.0 (0.01) | 0.6 (0.00) | <b>1.4</b> (0.04) | 9.5 (0.28)  | 3.2 (0.04) |
|                          |   | 0.2         | <b>0.4</b> (0.01) | 1.2 (0.04) | 0.6 (0.02) | <b>1.3</b> (0.04) | 10.2 (0.13) | 3.0 (0.10) |

Table B.2.  $a$ ,  $b$  and  $c$  report CPU time in seconds for fgen, sklearn and glmnet, respectively. The full  $c_\lambda$  grid consists of 100 log-spaced points between 1 and 0.01. We truncate the path search when  $max$  active components are selected.  $runs$  is the corresponding number of explored  $c_\lambda$  values. We fix 1000 seconds as time limit.

| $\alpha = 0.8, l = 0.25$ |   |     | n=500 |            |      | n=1000 |      |             | n=5000 |      |      |             |       |       |
|--------------------------|---|-----|-------|------------|------|--------|------|-------------|--------|------|------|-------------|-------|-------|
| $p; p_0$                 | k | max | runs  | a          | b    | c      | runs | a           | b      | c    | runs | a           | b     | c     |
| $10^5; 10^2$             | 5 | 5   | 7     | <b>1.6</b> | 26.2 | 3.2    | 8    | <b>3.8</b>  | 63.3   | 7.4  | 6    | <b>11.0</b> | 399.5 | 30.5  |
|                          |   | 20  | 12    | <b>2.8</b> | 45.4 | 5.2    | 14   | <b>5.2</b>  | 111.1  | 10.9 | 15   | <b>26.7</b> | >1000 | 59.1  |
|                          |   | 100 | 16    | <b>5.1</b> | 64.7 | 6.3    | 24   | <b>11.7</b> | 196.1  | 18.0 | 41   | <b>90.1</b> | >1000 | 146.7 |

## References

- Beck, A. (2017). *First-order methods in optimization*, Volume 25. SIAM.
- Boyd, S. and L. Vandenberghe (2004). *Convex optimization*. Cambridge university press.
- Correa, R., A. Jofre, and L. Thibault (1992). Characterization of lower semicontinuous convex functions. *Proceedings of the American Mathematical Society*, 67–72.
- Fan, Z. and M. Reimherr (2016). High-dimensional function-on-scale regression via the alternating direction method of multipliers. In *2016 3rd International Conference on Information Science and Control Engineering (ICISCE)*, pp. 397–399. IEEE.
- Hiriart-Urruty, J.-B., J.-J. Strodiot, and V. H. Nguyen (1984). Generalized hessian matrix and second-order optimality conditions for problems with 1, 1 data. *Applied mathematics and optimization* 11(1), 43–56.
- Parikh, N., S. Boyd, et al. (2014). Proximal algorithms. *Foundations and Trends® in Optimization* 1(3), 127–239.
- Touchette, H. (2005). Legendre-fenchel transforms in a nutshell. URL <http://www.maths.qmul.ac.uk/~ht/archive/lfth2.pdf>.
